# Supplementary material
Source: publisher site journal article supplement (https://www.spandidos-publications.com/2541/downloadSupplementary)
Supplement: Supplementary file 1 [file downloadSupplementary]

Video S1. Time-lapse movie illustrating control cells undergoing random motility.

Video S2. Time-lapse movie illustrating cells treated with LeTx undergoing random motility.
